# Supplementary material for: Tiny pollen grains: first evidence of Saururaceae from the Late Cretaceous of western North America
Source: PeerJ. 2017 Jun 13;5:e3434. doi: 10.7717/peerj.3434 (PMC5472062; doi:10.7717/peerj.3434)
Supplement: Table S1 [file peerj-05-3434-s002.xlsx]

## Sheet: Tabelle1
Supplementary Table S1. Herbarium specimens used for this study
Collection	Taxon	Collector	Date	Location	Label	Det./rev./conf./assigned	Ident. history	Annotations
WU s.n.	Anemopsis californica Hook & Arn.	Thorne, R.F. 32022	?	Mexico / Baja California	Rancho La Suerte
WU 0039758	Gymnotheca chinensis Decne.	Handel-Mazzetti,H.R.E. von Handel-Mazzetti, Iter sinense (1914-1918) 10641	1917-07-09	China / Guizhou	Prov. Kweitschou: Inter oppida Kweiting et Tuyün, in silvis umbrosis faucium prope vicum Madjiaduen. Locis scaturiginosis. 1100 m.	Handel-Mazzetti, teste Evans	orig.: Gymnotheca chinensis (Anonymous: Saururus cavaleriei)	DIar. Nr. 2094.
WU 0062658	Houttuynia cordata Thunb.	Taam,Y.W. 817	01.06.1938	China / Guangdong	Hau T'ong Shan, Fuk Lung Monastery, Sin-fung District. Kau Tip Ye.	E. D. Merrill	E. D. Merrill: Houttuynia cordata	ex A
WU 0039759	Houttuynia cordata Thunb.	Anonymous collector s.n.	08.08.1896		cult. hort. bot. Vindob.	Anonymous	orig.: Houttuynia cordata
WU 0039761	Houttuynia cordata Thunb.	Kanai,H. Nat. Sci. Mus., Tokyo: Flora japonica exsiccata 731171	1973-06-16	Japan	Honshu. Pref. Gifu: Kadohara [371355-42], Gerocho, Masuda-gun. 350m.	Anonymous	orig.: Houttuynia cordata	Fl. Jap. 234, t. 26 (1784).
WU 0039743	Saururus cernuus L.	Hoagland,B. 153	1988-06-05	USA / Kentucky	USA: Kentucky, Adair County. In a slow moving stream on the Drake Farm. Located on the southside of Old Pellytown Road, 0.3 miles west of Spruce-pine Creek.	Anonymous	orig.: Saururus cernuus	ex BEREA
WU s.n.	Saururus cernuus L.	Ehrendorfer, F.	1952-04-14	USA / Florida
WU 0039755	Saururus chinensis (Lour.) Baill.	Anonymous collector s.n.	12.07.1893	Japan	Shimura, Musashi.	H. Rainer (WU) 24.08.2007	orig.: Saururus loureirii; H. Rainer (WU) 24.08.2007 = Saururus chinensis
WU 0039752	Saururus chinensis (Lour.) Baill.	Wang,T.-H. Plantae sinenses curante Dre. Henr. Handel-Mazzetti 369	June 1921	China	Inconfinibus prov. Kianghsi et Fukien: In monte Hwangdschu-ling inter Dingdschou et Ningdu, in lacunis ad pedem.	H.R.E. von Handel-Mazzetti	orig.: Saururus loureirii, Anonymous: S. chinensis
